# Supplementary material for: Multidecadal trend analysis of in situ aerosol radiative properties around the world
Source: Copernicus journal article supplement (doi:10.5194/acp-20-8867-2020), 2020-07-27
Supplement: Supplementary file 1 [file acp-20-8867-2020-supplement.pdf]

Supplement of Atmos. Chem. Phys., 20, 8867–8908, 2020  
<https://doi.org/10.5194/acp-20-8867-2020-supplement>  
© Author(s) 2020. This work is distributed under  
the Creative Commons Attribution 4.0 License.

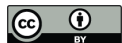

*Supplement of*

## **Multidecadal trend analysis of in situ aerosol radiative properties around the world**

**Martine Collaud Coen et al.**

*Correspondence to:* Martine Collaud Coen ([martine.collaudcoen@meteoswiss.ch](mailto:martine.collaudcoen@meteoswiss.ch))

The copyright of individual parts of the supplement might differ from the CC BY 4.0 License.

## Supplementary material:

### 1) List of instruments characteristic

**Table S1** Measurement description

| Scattering Instrument,<br>Model number                                                                                              | Scattering<br>wavelengths (nm) <sup>1</sup>                                                 | Corrections                                                                                                                          | Manufacturer Info                     |
|-------------------------------------------------------------------------------------------------------------------------------------|---------------------------------------------------------------------------------------------|--------------------------------------------------------------------------------------------------------------------------------------|---------------------------------------|
| TSI total/backscatter<br>nephelometer, 3563                                                                                         | 450, 550, 700                                                                               | Anderson and Ogren [1998]                                                                                                            | TSI, Inc.<br>St. Paul, MN USA         |
| Optec open-air<br>nephelometer, NGN-2                                                                                               | 550                                                                                         | none applied                                                                                                                         | Optec, Inc.<br>Lowell, MI USA         |
| Radiance Research<br>nephelometer, M903                                                                                             | 532                                                                                         | none applied<br>could use A&O corrections for<br>assumed SAE (Table 4b?)<br>but probably doesn't matter for<br>trends since constant | Radiance Research<br>Seattle, WA, USA |
| Ecotech Aurora 3000<br>nephelometer, ...                                                                                            | 450, 525, 630                                                                               | Anderson and Ogren [1998]<br>should use A&O based on Müller<br>et al., 2011                                                          | Ecotech<br>Melbourne, Australia       |
| Absorption Instrument,<br>Model number                                                                                              | Absorption<br>wavelengths (nm) <sup>1</sup>                                                 | Corrections                                                                                                                          | Manufacturer Info                     |
| Aethalometer AE9, AE10,<br>AE16: white light<br>Aethalometer AE22: 2<br>wavelengths<br>Aethalometer AE31 and<br>AE33: 7 wavelengths | broadband centered<br>at 840 nm<br>370 and 880 nm<br><br>370,470,520,590,660<br>,880,950 nm | $C_{ref}=1.80$<br><br>AE31: $C_{ref}=3.5$<br>AE33: $C_{ref}=3.0$                                                                     | Magee Scientific,<br>Berkeley, CA USA |
| PSAP - 1 wavelength<br>PSAP - 3 wavelengths                                                                                         | 565 <sup>psap</sup><br>467, 530, 660 <sup>psap</sup>                                        | Bond et al. [1999]<br>Ogren [2010]                                                                                                   | Radiance Research,<br>Seattle, WA USA |
| MAAP                                                                                                                                | 637                                                                                         | none applied                                                                                                                         | Thermo Scientific<br>Franklin, MA USA |
| CLAP 3w                                                                                                                             | 467, 528, 652                                                                               | Bond et al. [1999]<br>Ogren [2010]                                                                                                   | NOAA<br>Boulder, CO USA               |

<sup>1</sup>Reported by manufacturer; <sup>psap</sup>In this work we use PSAP data adjusted to 550 nm, based on Bond et al. [1999] for 1- wavelength instrument or Ogren, [2010] for 3-wavelength.

2) Present-day MK results not shown in the paper

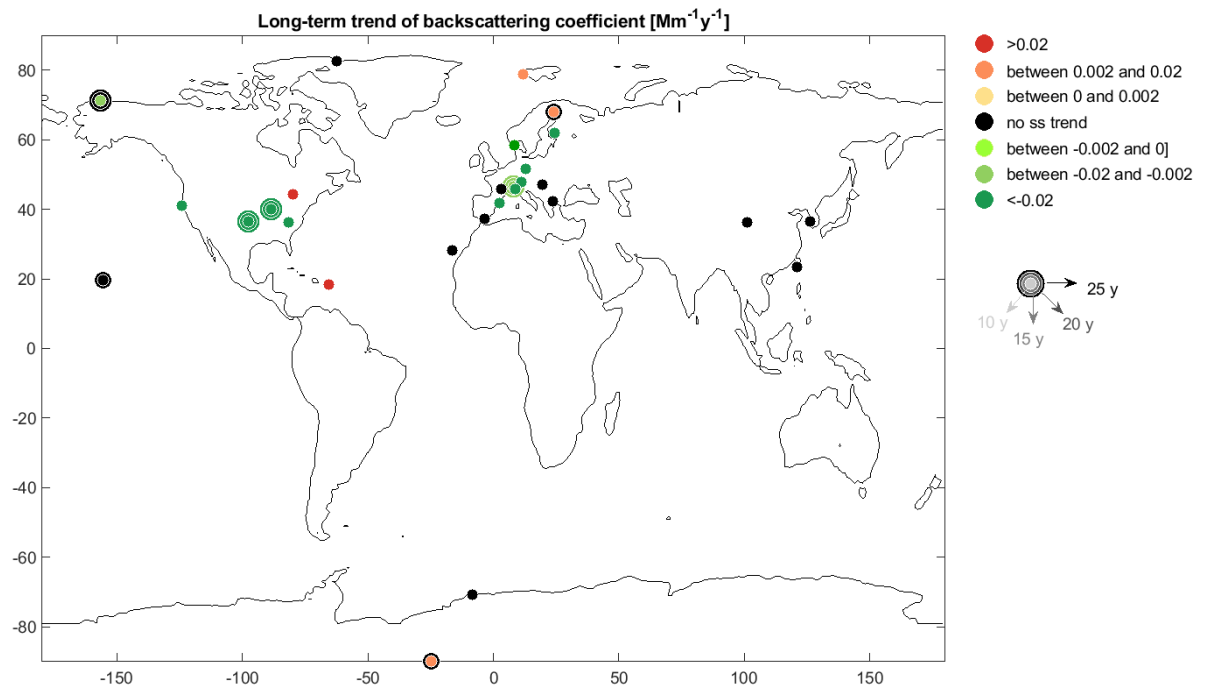

Fig. S1: MK trends results for the backscattering coefficient. Black symbols correspond to stations with no significant trends. Green and orange symbols correspond to statistically significant negative and positive trends, respectively, the magnitude of the trends (slope) being given by the colors as stipulated in the legend. The size of the circles are proportional to the length of the data sets with the central dots representing the present-day 10 years trend ending in 2016, 2017 or 2018. If possible, trends for longer periods were calculated and the larger circles denote the trends for 15 y to 40 y in 5-year increments.

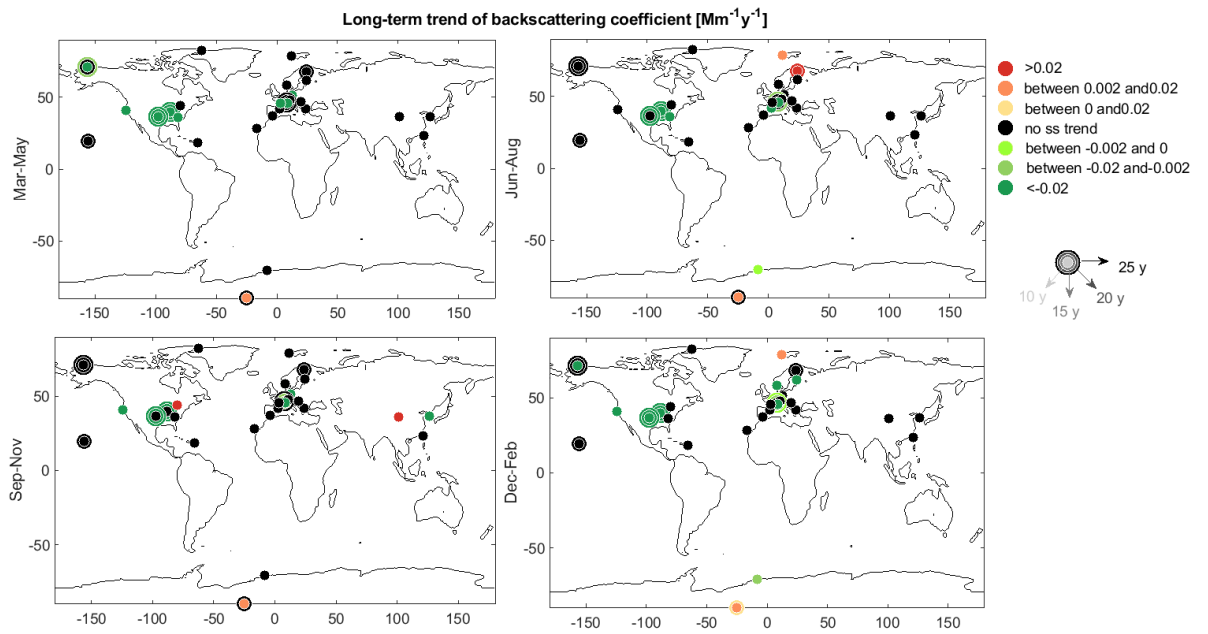

Fig. S2: Seasonal results of the MK trend of the backscattering coefficient. Other details same as Fig. S1.

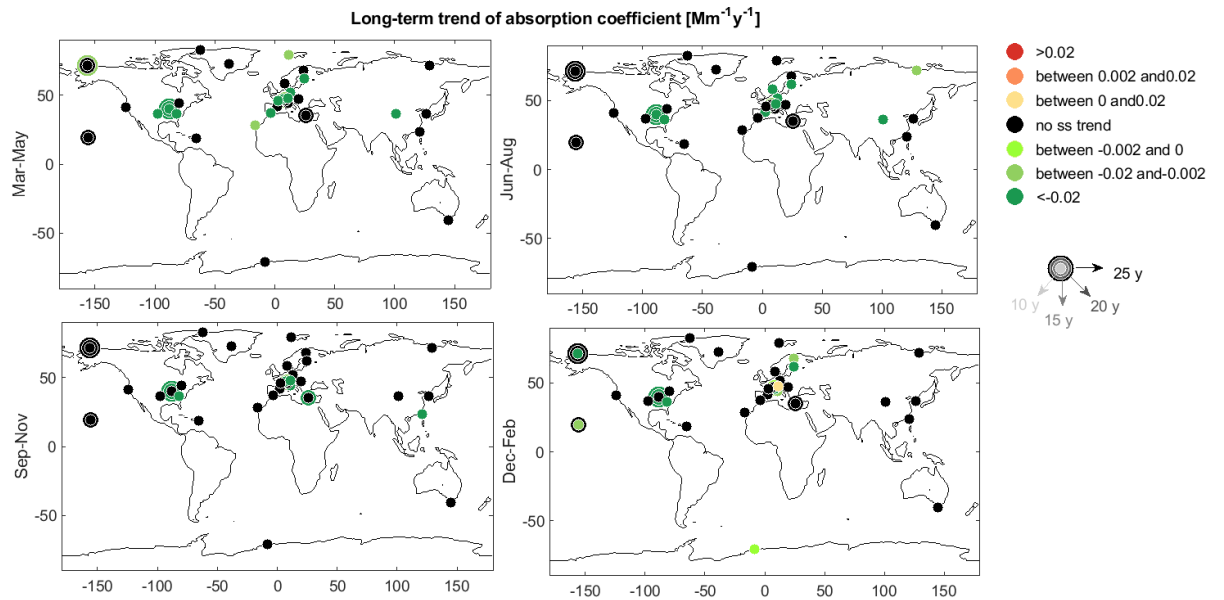

Fig. S3: Seasonal results of the MK trend of the absorption coefficient. Other details same as Fig. S1.

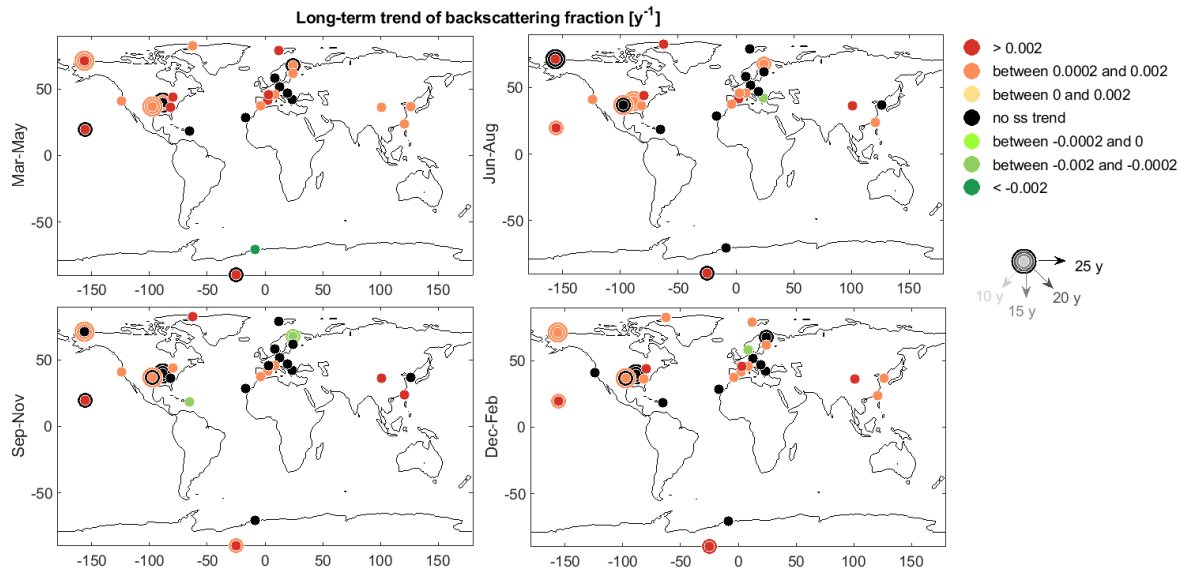

Fig. S4: Seasonal results of the MK trend of the backscattering fraction. Other details same as Fig. S1.

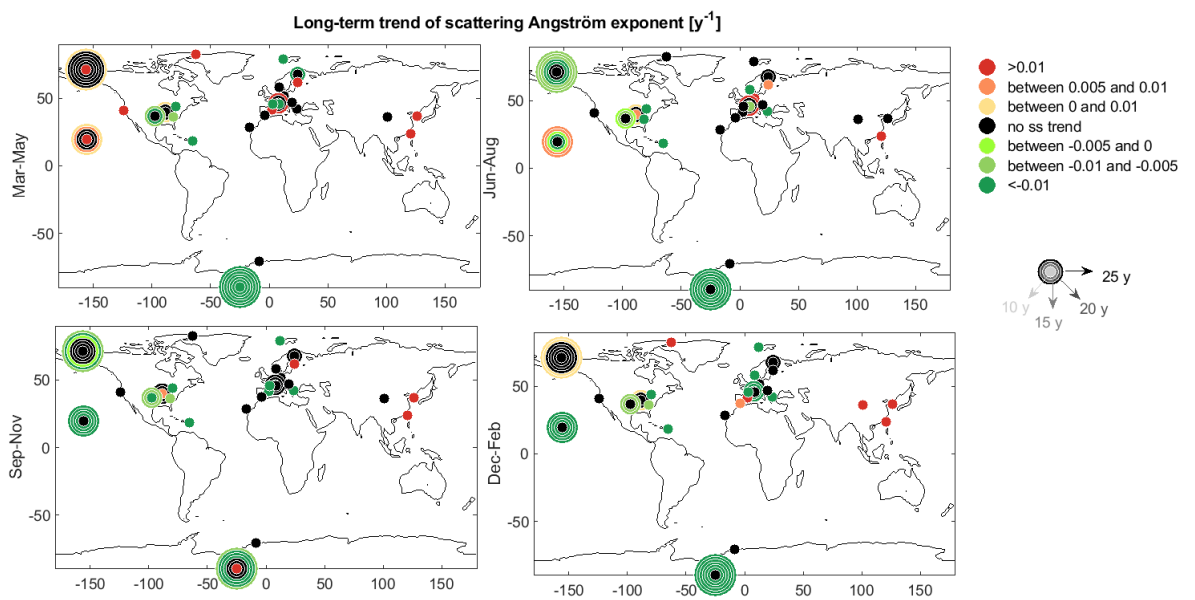

Fig. S5: Seasonal results of the MK trend of the scattering Ångström exponent. Other details same as Fig. S1.

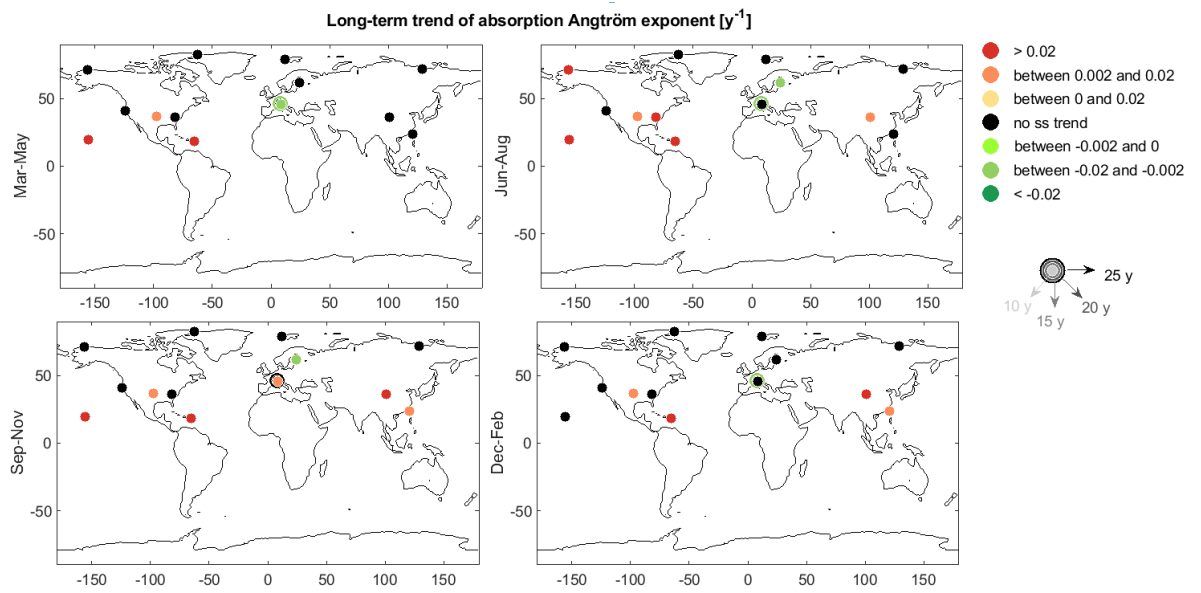

Fig. S6: Seasonal results of the MK trend of the absorption Angström exponent. Other details same as Fig. S1.

3) Present-day trend results for MK, LMS and GLS/ARB methods in %/y

Table S1: Present –day results for MK in %/y

| Station              | $\sigma_{sp}$ |              |              | $\sigma_{bsp}$ |              |              | $\sigma_{ap}$ |              |              | $\omega_o$   |              |              | b            |             |             | $\hat{a}_{sp}$ |              |             | $\hat{a}_{ap}$ |              |
|----------------------|---------------|--------------|--------------|----------------|--------------|--------------|---------------|--------------|--------------|--------------|--------------|--------------|--------------|-------------|-------------|----------------|--------------|-------------|----------------|--------------|
|                      | 10 y          | 15 y         | 20 y         | 10 y           | 15 y         | 20 y         | 10 y          | 15 y         | 20 y         | 10 y         | 15 y         | 20 y         | 10 y         | 15 y        | 20 y        | 10 y           | 15 y         | 20 y        | 10 y           | 15 y         |
| <b>Africa</b>        |               |              |              |                |              |              |               |              |              |              |              |              |              |             |             |                |              |             |                |              |
| IZO                  | -4.60         |              |              | -2.31          |              |              | <b>-3.84</b>  |              |              | -0.02        |              |              | <b>0.41</b>  |             |             | -0.16          |              |             |                |              |
| <b>Asia</b>          |               |              |              |                |              |              |               |              |              |              |              |              |              |             |             |                |              |             |                |              |
| AMY                  | -1.62         |              |              | -1.29          |              |              | -0.27         |              |              | <b>-0.08</b> |              |              | 0.48         |             |             | <b>1.19</b>    |              |             |                |              |
| LLN                  | -1.94         |              |              | -1.30          |              |              | <b>-7.49</b>  |              |              | <b>0.40</b>  |              |              | <b>1.34</b>  |             |             | <b>1.36</b>    |              |             | 0.44           |              |
| WLG                  | -1.81         |              |              | 0.51           |              |              | <b>-3.22</b>  |              |              | <b>0.05</b>  |              |              | <b>1.86</b>  |             |             | 1.55           |              |             | <b>2.30</b>    |              |
| <b>Europe</b>        |               |              |              |                |              |              |               |              |              |              |              |              |              |             |             |                |              |             |                |              |
| BEO                  | -1.26         |              |              | 3.76           |              |              |               |              |              |              |              |              | <b>-1.28</b> |             |             | <b>-1.39</b>   |              |             |                |              |
| BIR                  | <b>-3.11</b>  |              |              | <b>-3.27</b>   |              |              | <b>-4.21</b>  |              |              | 0.11         |              |              | -0.32        |             |             | <b>-1.36</b>   |              |             |                |              |
| CMN                  |               |              |              |                |              |              | <b>-1.98</b>  |              |              |              |              |              |              |             |             |                |              |             |                |              |
| FKL                  |               |              |              |                |              |              | -0.05         |              |              | <b>-0.16</b> |              |              |              |             |             |                |              |             |                |              |
| HPB                  | <b>-4.14</b>  |              |              | <b>-3.42</b>   |              |              | <b>-4.41</b>  |              |              | <b>0.06</b>  |              |              |              |             |             |                |              |             |                |              |
| HYY                  | <b>-2.91</b>  |              |              | <b>-2.24</b>   |              |              | <b>-4.20</b>  |              |              | <b>0.28</b>  |              |              | <b>0.60</b>  |             |             | <b>0.91</b>    |              |             | <b>-0.44</b>   |              |
| IPR                  | <b>-7.30</b>  |              |              | <b>-6.71</b>   |              |              | <b>-1.85</b>  |              |              | <b>-1.04</b> |              |              | <b>0.86</b>  |             |             | <b>-0.50</b>   |              |             | 0.11           |              |
| JFJ                  | <b>-8.34</b>  | <b>-5.35</b> | <b>-2.89</b> | <b>-4.71</b>   | <b>-3.55</b> | <b>-2.28</b> | <b>-10.22</b> | <b>-3.37</b> |              | <b>-0.31</b> | <b>-0.11</b> |              |              |             |             | <b>-1.52</b>   | <b>-0.43</b> | <b>0.21</b> | <b>-0.73</b>   | <b>-0.57</b> |
| KPS                  | -1.02         |              |              | -0.62          |              |              | -0.50         |              |              | <b>0.14</b>  |              |              | -0.04        |             |             | 0.00           |              |             |                |              |
| MPZ                  | <b>-5.47</b>  |              |              | <b>-4.65</b>   |              |              | <b>-5.44</b>  |              |              | 0.02         |              |              | -0.06        |             |             | 0.37           |              |             |                |              |
| MSY                  | <b>-6.00</b>  |              |              | <b>-4.02</b>   |              |              | <b>-1.67</b>  |              |              | <b>-0.41</b> |              |              | <b>2.16</b>  |             |             | <b>0.51</b>    |              |             |                |              |
| PAL                  | <b>2.76</b>   | 0.56         |              | <b>4.09</b>    | 0.97         |              | -3.86         |              |              | <b>0.26</b>  |              |              | 0.50         | 0.01        |             | 0.64           | 0.03         |             |                |              |
| PAY                  |               |              |              |                |              |              | <b>-3.86</b>  |              |              |              |              |              |              |             |             |                |              |             |                |              |
| PUY                  | -3.24         |              |              | -1.72          |              |              | <b>-3.62</b>  |              |              | <b>0.23</b>  |              |              | <b>1.66</b>  |             |             | <b>-0.97</b>   |              |             |                |              |
| UGR                  | 1.31          |              |              | 1.66           |              |              | <b>-0.44</b>  |              |              | <b>0.28</b>  |              |              | <b>0.88</b>  |             |             | <b>0.74</b>    |              |             |                |              |
| ZSF                  |               |              |              |                |              |              | <b>-11.79</b> |              |              |              |              |              |              |             |             |                |              |             |                |              |
| <b>North America</b> |               |              |              |                |              |              |               |              |              |              |              |              |              |             |             |                |              |             |                |              |
| ACA                  | <b>-4.80</b>  | <b>-2.64</b> | <b>-2.28</b> |                |              |              |               |              |              |              |              |              |              |             |             |                |              |             |                |              |
| APP                  | <b>-4.29</b>  |              |              | <b>-3.28</b>   |              |              | <b>-5.35</b>  |              |              | <b>0.08</b>  |              |              | <b>1.34</b>  |             |             | <b>-0.49</b>   |              |             | -0.05          |              |
| BND                  | <b>-3.86</b>  | <b>-2.45</b> | <b>-1.84</b> | <b>-3.61</b>   | <b>-2.30</b> | <b>-1.74</b> | <b>-2.88</b>  | <b>-3.17</b> | <b>-1.28</b> | <b>-0.09</b> | -0.05        | <b>-0.06</b> | 0.15         | <b>0.43</b> | <b>0.18</b> | <b>0.44</b>    | 0.10         | <b>0.25</b> |                |              |

|                      |              |              |              |              |              |              |              |       |              |             |              |             |              |              |              |              |              |              |             |
|----------------------|--------------|--------------|--------------|--------------|--------------|--------------|--------------|-------|--------------|-------------|--------------|-------------|--------------|--------------|--------------|--------------|--------------|--------------|-------------|
| CPR                  | <b>2.93</b>  |              | <b>2.59</b>  |              |              | <b>-3.08</b> |              |       | <b>0.14</b>  |             | <b>-0.35</b> |             | <b>-6.34</b> |              | <b>6.73</b>  |              |              |              |             |
| EGB                  | 0.93         |              | <b>2.83</b>  |              |              | 0.81         |              |       | 0.11         |             | <b>2.41</b>  |             | <b>-1.71</b> | <b>-1.40</b> |              |              |              |              |             |
| GBN                  | <b>-5.42</b> |              |              |              |              |              |              |       |              |             |              |             |              |              |              |              |              |              |             |
| GLR                  | 1.48         |              |              |              |              |              |              |       |              |             |              |             |              |              |              |              |              |              |             |
| HGC                  | <b>-3.72</b> | <b>-3.39</b> | <b>-1.33</b> |              |              |              |              |       |              |             |              |             |              |              |              |              |              |              |             |
| MCN                  | <b>-4.96</b> | <b>-3.65</b> | <b>-2.40</b> |              |              |              |              |       |              |             |              |             |              |              |              |              |              |              |             |
| MRN                  | -0.24        | <b>-0.97</b> | <b>-1.74</b> |              |              |              |              |       |              |             |              |             |              |              |              |              |              |              |             |
| RMN                  | <b>-3.57</b> |              |              |              |              |              |              |       |              |             |              |             |              |              |              |              |              |              |             |
| SGP                  | <b>-1.71</b> | <b>-1.64</b> | <b>-1.67</b> | <b>-1.48</b> | <b>-1.75</b> | <b>-1.31</b> | -0.59        |       | <b>-0.19</b> |             | <b>0.92</b>  | <b>0.27</b> | <b>0.50</b>  | <b>-0.70</b> | <b>-0.64</b> | <b>-0.53</b> | <b>1.79</b>  |              |             |
| SHN                  | <b>-2.93</b> | <b>-2.76</b> | <b>-2.18</b> |              |              |              |              |       |              |             |              |             |              |              |              |              |              |              |             |
| THD                  | <b>-5.16</b> |              |              | <b>-5.02</b> |              |              | -2.27        |       | <b>-0.06</b> |             | <b>0.42</b>  |             | <b>2.60</b>  |              |              |              | 0.35         |              |             |
| <b>South Pacific</b> |              |              |              |              |              |              |              |       |              |             |              |             |              |              |              |              |              |              |             |
| CGO                  | <b>3.57</b>  |              |              |              |              |              | 0.77         |       | 0.01         |             |              |             |              |              |              |              |              |              |             |
| MLO                  | <b>-2.11</b> | 0.01         | <b>0.52</b>  | -0.57        | 1.02         |              | <b>-4.59</b> | 1.63  |              | <b>0.27</b> | <b>-0.22</b> |             | <b>3.40</b>  | <b>0.88</b>  |              | 0.36         | <b>-1.58</b> | <b>-0.72</b> | <b>6.48</b> |
| <b>Polar regions</b> |              |              |              |              |              |              |              |       |              |             |              |             |              |              |              |              |              |              |             |
| ALT                  | <b>-0.23</b> |              |              | -0.04        |              |              | <b>2.77</b>  |       | <b>0.12</b>  |             | <b>1.46</b>  |             | <b>1.24</b>  |              |              |              | <b>1.09</b>  |              |             |
| BRW                  | <b>-6.16</b> | -2.35        | <b>-1.26</b> | <b>-3.99</b> | -1.07        | -0.76        | <b>-9.91</b> | -2.60 | -3.53        | 0.02        | -0.05        | -0.03       | <b>1.72</b>  | <b>1.08</b>  | <b>0.54</b>  | <b>1.69</b>  | 0.68         | <b>-0.27</b> | -0.54       |
| NMY                  | 0.97         |              |              | -0.51        |              |              | <b>-1.76</b> |       |              | 0.01        |              |             | -0.62        |              |              | -0.61        |              |              |             |
| SPO                  | <b>2.59</b>  | -0.22        | <b>1.80</b>  | <b>8.08</b>  | 0.53         |              |              |       |              |             |              | <b>6.10</b> | 0.34         |              | <b>-1.66</b> | <b>-1.91</b> | <b>-2.41</b> |              |             |
| SUM                  |              |              |              |              |              |              | -0.36        | 1.58  |              |             |              |             |              |              |              |              |              |              |             |
| TIK                  |              |              |              |              |              |              | <b>-0.90</b> |       |              |             |              |             |              |              |              |              |              |              | -0.28       |
| ZEP                  | <b>4.32</b>  |              |              | <b>4.00</b>  |              |              | -0.19        |       |              | <b>0.12</b> |              | <b>0.41</b> | <b>0.41</b>  |              | <b>-1.78</b> | <b>-0.29</b> | <b>-1.78</b> |              | <b>0.38</b> |

Table S2: Present –day results for GLS/ARB applied on daily median in %/y

| Station       | $\sigma_{sp}$ |      |      | $\sigma_{bsp}$ |      |      | $\sigma_{ap}$ |      |      | $\omega_o$   |      |      | $b$  |      |      | $\dot{a}_{sp}$ |      |      | $\dot{a}_{ap}$ |      |
|---------------|---------------|------|------|----------------|------|------|---------------|------|------|--------------|------|------|------|------|------|----------------|------|------|----------------|------|
|               | 10 y          | 15 y | 20 y | 10 y           | 15 y | 20 y | 10 y          | 15 y | 20 y | 10 y         | 15 y | 20 y | 10 y | 15 y | 20 y | 10 y           | 15 y | 20 y | 10 y           | 15 y |
| <b>Africa</b> |               |      |      |                |      |      |               |      |      |              |      |      |      |      |      |                |      |      |                |      |
| IZO           | 11.30         |      |      | 11.76          |      |      | 0.48          |      |      | 0.10         |      |      | 0.45 |      |      | -2.04          |      |      |                |      |
| <b>Asia</b>   |               |      |      |                |      |      |               |      |      |              |      |      |      |      |      |                |      |      |                |      |
| AMY           | <b>-3.11</b>  |      |      | <b>-2.59</b>   |      |      | <b>-1.52</b>  |      |      | <b>-0.06</b> |      |      | 0.27 |      |      | <b>1.01</b>    |      |      |                |      |



|                      |               |                          |               |               |              |               |               |              |              |              |              |              |              |              |              |              |              |             |
|----------------------|---------------|--------------------------|---------------|---------------|--------------|---------------|---------------|--------------|--------------|--------------|--------------|--------------|--------------|--------------|--------------|--------------|--------------|-------------|
| LLN                  | -5.39         |                          | -2.39         |               |              | <b>-10.48</b> |               |              | <b>0.57</b>  |              | <b>2.52</b>  |              | <b>1.53</b>  |              | 1.12         |              |              |             |
| WLG                  | <b>-7.45</b>  |                          | -2.10         |               |              | <b>-6.57</b>  |               |              | <b>0.08</b>  |              | <b>3.38</b>  |              | 0.12         |              | <b>3.30</b>  |              |              |             |
| <b>Europe</b>        |               |                          |               |               |              |               |               |              |              |              |              |              |              |              |              |              |              |             |
| BEO                  | <b>-4.69</b>  |                          | 0.12          |               |              |               |               |              |              |              | <b>-1.47</b> |              | <b>-2.16</b> |              |              |              |              |             |
| BIR                  | <b>-6.49</b>  |                          | <b>-6.09</b>  |               |              | <b>-16.84</b> |               |              | -0.04        |              | -0.30        |              | <b>-2.35</b> |              |              |              |              |             |
| CMN                  |               |                          |               |               |              | <b>-7.80</b>  |               |              |              |              |              |              |              |              |              |              |              |             |
| FKL                  |               |                          |               |               |              | 0.77          | <b>-1.69</b>  |              |              |              |              |              |              |              |              |              |              |             |
| HPB                  | <b>-6.67</b>  |                          | <b>-4.46</b>  |               |              | <b>-8.15</b>  |               |              | <b>0.15</b>  |              |              |              |              |              |              |              |              |             |
| HYY                  | <b>-5.90</b>  |                          | <b>-2.96</b>  |               |              | <b>-10.35</b> |               |              | <b>0.48</b>  |              | <b>0.70</b>  |              | <b>0.97</b>  |              | <b>-0.63</b> |              |              |             |
| IPR                  | <b>-18.89</b> |                          | <b>-15.80</b> |               |              | <b>-9.91</b>  |               |              | <b>-1.53</b> |              | -0.13        |              | <b>-0.54</b> |              | 0.19         |              |              |             |
| JFJ                  | <b>-24.47</b> | <b>-</b><br><b>12.29</b> | <b>-6.60</b>  | <b>-12.56</b> | <b>-7.61</b> | <b>-5.37</b>  | <b>-14.23</b> | <b>-7.76</b> | <b>-0.36</b> | <b>-0.15</b> |              |              | <b>-2.01</b> | <b>-0.88</b> | <b>-0.11</b> | <b>-1.20</b> | <b>-0.53</b> |             |
| KPS                  | -0.42         |                          |               | -0.67         |              |               | -0.90         |              | <b>0.20</b>  |              | -0.03        |              | -0.20        |              |              |              |              |             |
| MPZ                  | <b>-7.60</b>  |                          |               | <b>-5.68</b>  |              |               | <b>-9.25</b>  |              | <b>0.12</b>  |              | -0.38        |              | 0.15         |              |              |              |              |             |
| MSY                  | <b>-12.14</b> |                          |               | <b>-6.18</b>  |              |               | <b>-3.18</b>  |              | <b>-0.44</b> |              | <b>4.60</b>  |              | <b>2.08</b>  |              |              |              |              |             |
| PAL                  | <b>10.59</b>  | 1.44                     |               | <b>11.67</b>  | <b>2.72</b>  |               | -5.55         |              | <b>0.55</b>  |              | <b>0.96</b>  | <b>0.83</b>  | 0.36         | -0.23        |              |              |              |             |
| PAY                  |               |                          |               |               |              |               | <b>-4.04</b>  |              |              |              |              |              |              |              |              |              |              |             |
| PUY                  | <b>-5.39</b>  |                          | -2.15         |               |              | <b>-5.18</b>  |               |              | <b>0.50</b>  |              | <b>3.14</b>  |              | <b>-2.03</b> |              |              |              |              |             |
| UGR                  | -0.92         |                          | 0.49          |               |              | <b>-2.44</b>  |               |              | <b>0.41</b>  |              | <b>1.22</b>  |              | <b>0.88</b>  |              |              |              |              |             |
| ZSF                  |               |                          |               |               |              | <b>-20.45</b> |               |              |              |              |              |              |              |              |              |              |              |             |
| <b>North America</b> |               |                          |               |               |              |               |               |              |              |              |              |              |              |              |              |              |              |             |
| ACA                  | <b>-9.41</b>  | <b>-7.62</b>             | <b>-5.49</b>  |               |              |               |               |              |              |              |              |              |              |              |              |              |              |             |
| APP                  | <b>-5.92</b>  |                          |               | <b>-3.51</b>  |              |               | <b>-6.35</b>  |              | <b>0.11</b>  |              | <b>1.50</b>  |              | <b>-0.68</b> |              | <b>1.52</b>  |              |              |             |
| BND                  | <b>-6.54</b>  | <b>-4.67</b>             | <b>-3.06</b>  | <b>-5.36</b>  | <b>-3.41</b> | <b>-2.48</b>  | <b>-3.70</b>  | <b>-4.57</b> | <b>-2.04</b> | <b>-0.13</b> | <b>-0.02</b> | <b>-0.01</b> | <b>0.38</b>  | <b>0.54</b>  | <b>0.15</b>  | <b>0.43</b>  | <b>0.03</b>  | <b>0.22</b> |
| CPR                  | <b>2.57</b>   |                          |               | <b>2.35</b>   |              |               | -5.37         |              | <b>0.23</b>  |              | <b>-0.27</b> |              | <b>-9.80</b> |              | <b>8.05</b>  |              |              |             |
| EGB                  | -2.61         |                          |               | 1.87          |              |               | <b>3.28</b>   |              | -0.03        |              | <b>2.58</b>  |              | <b>-2.34</b> | <b>-2.22</b> |              |              |              |             |
| GBN                  | <b>-5.84</b>  |                          |               |               |              |               |               |              |              |              |              |              |              |              |              |              |              |             |
| GLR                  | 1.99          |                          |               |               |              |               |               |              |              |              |              |              |              |              |              |              |              |             |
| HGC                  | <b>-7.48</b>  | <b>-5.49</b>             | <b>-2.91</b>  |               |              |               |               |              |              |              |              |              |              |              |              |              |              |             |
| MCN                  | <b>-7.06</b>  | <b>-7.11</b>             | <b>-5.09</b>  |               |              |               |               |              |              |              |              |              |              |              |              |              |              |             |
| MRN                  | -0.55         | <b>-1.04</b>             | <b>-1.95</b>  |               |              |               |               |              |              |              |              |              |              |              |              |              |              |             |
| RMN                  | -1.44         |                          |               |               |              |               |               |              |              |              |              |              |              |              |              |              |              |             |
| SGP                  | <b>-3.40</b>  | <b>-3.61</b>             | <b>-3.09</b>  | <b>-2.87</b>  | <b>-3.13</b> | <b>-2.06</b>  | <b>-1.38</b>  |              | <b>-0.12</b> |              | <b>0.88</b>  | <b>0.30</b>  | <b>0.57</b>  | <b>-1.03</b> | <b>-0.93</b> | <b>-0.72</b> | <b>2.44</b>  |             |
| SHN                  | <b>-6.82</b>  | <b>-8.41</b>             | <b>-6.11</b>  |               |              |               |               |              |              |              |              |              |              |              |              |              |              |             |
| THD                  | <b>-6.78</b>  |                          |               | <b>-5.96</b>  |              |               | <b>-10.62</b> |              | -0.06        |              | <b>0.94</b>  |              | <b>3.01</b>  |              | 0.50         |              |              |             |

| South Pacific |               |       |             |              |       |               |               |       |              |              |      |              |             |                                             |       |                                            |
|---------------|---------------|-------|-------------|--------------|-------|---------------|---------------|-------|--------------|--------------|------|--------------|-------------|---------------------------------------------|-------|--------------------------------------------|
| CGO           | <b>3.98</b>   |       |             |              | 6.49  |               |               |       | <b>0.06</b>  |              |      |              |             |                                             |       |                                            |
| MLO           | <b>-15.20</b> | -0.77 | <b>2.59</b> | <b>-5.64</b> | 0.34  | <b>-18.98</b> | 2.84          |       | <b>0.31</b>  | <b>-0.37</b> |      | <b>3.96</b>  | <b>0.86</b> | 0.03 <b>-2.15</b> <b>-1.84</b> <b>9.23</b>  |       |                                            |
| Polar regions |               |       |             |              |       |               |               |       |              |              |      |              |             |                                             |       |                                            |
| ALT           | <b>-5.36</b>  |       |             | <b>-3.39</b> |       | <b>-9.06</b>  |               |       | <b>0.23</b>  |              |      | <b>3.31</b>  |             | <b>1.08</b> 1.07                            |       |                                            |
| BRW           | <b>-7.13</b>  | -1.44 | -0.65       | <b>-3.60</b> | -0.08 | 0.12          | <b>-11.33</b> | -0.94 | <b>-3.00</b> | <b>0.14</b>  | 0.12 | 0.03         | <b>5.00</b> | -2.31                                       | 0.05  | <b>1.82</b> <b>-1.03</b> <b>-1.40</b> 1.15 |
| NMY           | 42.10         |       |             | 295.99       |       |               | <b>-5.07</b>  |       | <b>0.02</b>  |              |      | <b>-1.38</b> |             | <b>-1.10</b>                                |       |                                            |
| SPO           | 0.52          | -2.44 | 1.24        | <b>8.27</b>  | 0.06  |               |               |       |              |              |      | <b>7.84</b>  | <b>1.12</b> | <b>-1.77</b> <b>-1.62</b> <b>-1.96</b>      |       |                                            |
| SUM           |               |       |             |              |       | -5.20         | 0.22          |       |              |              |      |              |             |                                             |       |                                            |
| TIK           |               |       |             |              |       | 0.25          |               |       |              |              |      |              |             |                                             | -0.38 |                                            |
| ZEP           | <b>6.14</b>   |       |             | <b>7.68</b>  |       | 0.78          |               |       | 0.13         |              |      | <b>1.67</b>  | <b>1.67</b> | <b>-1.94</b> <b>-0.86</b> <b>-1.94</b> 0.62 |       |                                            |

Table S3: Present –day results for LMS applied on the logarithm of monthly median in %/period

| Station | $\sigma_{sp}$ |              |              | $\sigma_{bsp}$ |              |              | $\sigma_{ap}$ |              |      | $\omega_o$   |              |      | $b$          |      |      | $\hat{a}_{sp}$ |              |              | $\hat{a}_{ap}$ |               |
|---------|---------------|--------------|--------------|----------------|--------------|--------------|---------------|--------------|------|--------------|--------------|------|--------------|------|------|----------------|--------------|--------------|----------------|---------------|
|         | 10 y          | 15 y         | 20 y         | 10 y           | 15 y         | 20 y         | 10 y          | 15 y         | 20 y | 10 y         | 15 y         | 20 y | 10 y         | 15 y | 20 y | 10 y           | 15 y         | 20 y         | 10 y           | 15 y          |
| Africa  |               |              |              |                |              |              |               |              |      |              |              |      |              |      |      |                |              |              |                |               |
| IZO     | -0.92         |              |              | 0.71           |              |              | -2.95         |              |      | -0.10        |              |      | 0.07         |      |      | -10.75         |              |              |                |               |
| Asia    |               |              |              |                |              |              |               |              |      |              |              |      |              |      |      |                |              |              |                |               |
| AMY     | -0.47         |              |              | <b>-0.89</b>   |              |              | -1.16         |              |      | -1.46        |              |      | 0.08         |      |      | <b>2.32</b>    |              |              |                |               |
| LLN     | -1.10         |              |              | -2.71          |              |              | <b>-76.35</b> |              |      | <b>5.72</b>  |              |      | <b>0.82</b>  |      |      | <b>3.04</b>    |              |              |                | 11.88         |
| WLG     | <b>-0.88</b>  |              |              | 0.12           |              |              | <b>-3.77</b>  |              |      | 1.16         |              |      | <b>1.78</b>  |      |      | 6.64           |              |              |                | <b>6.54</b>   |
| Europe  |               |              |              |                |              |              |               |              |      |              |              |      |              |      |      |                |              |              |                |               |
| BEO     | <b>-1.91</b>  |              |              | -4.70          |              |              |               |              |      |              |              |      | -0.60        |      |      | <b>-4.52</b>   |              |              |                |               |
| BIR     | -1.75         |              |              | <b>-140.52</b> |              |              | <b>-65.36</b> |              |      | 0.06         |              |      | <b>-0.31</b> |      |      | <b>-10.06</b>  |              |              |                |               |
| CMN     |               |              |              |                |              |              | -20.90        |              |      |              |              |      |              |      |      |                |              |              |                |               |
| FKL     |               |              |              |                |              |              | 0.60          | <b>-3.17</b> |      |              |              |      |              |      |      |                |              |              |                |               |
| HPB     | <b>-1.75</b>  |              |              | <b>-4.70</b>   |              |              | <b>-6.87</b>  |              |      | 0.52         |              |      |              |      |      |                |              |              |                |               |
| HYY     | <b>-1.76</b>  |              |              | <b>-7.53</b>   |              |              | <b>-24.11</b> |              |      | <b>3.71</b>  |              |      | <b>0.47</b>  |      |      | <b>1.46</b>    |              |              |                | <b>-20.84</b> |
| IPR     | <b>-3.31</b>  |              |              | <b>-6.65</b>   |              |              | <b>-2.68</b>  |              |      | <b>-6.45</b> |              |      | <b>0.53</b>  |      |      | -0.45          |              |              |                | 4.25          |
| JFJ     | <b>-12.60</b> | <b>-6.43</b> | <b>-2.97</b> | <b>-6.86</b>   | <b>-4.31</b> | <b>-2.52</b> | <b>-3.71</b>  | <b>-2.88</b> |      | <b>-3.60</b> | <b>-1.62</b> |      |              |      |      | <b>-3.34</b>   | <b>-1.16</b> | <b>-0.03</b> | <b>-23.61</b>  | <b>-0.57</b>  |
| KPS     | 0.02          |              |              | -0.09          |              |              | -0.48         |              |      | 1.34         |              |      | -0.10        |      |      | -0.49          |              |              |                |               |
| MPZ     | <b>-1.33</b>  |              |              | <b>-2.60</b>   |              |              | <b>-4.56</b>  |              |      | <b>1.48</b>  |              |      | -0.21        |      |      | 0.11           |              |              |                |               |

|                      |               |              |              |               |              |              |               |              |              |              |              |       |              |             |             |               |              |               |              |
|----------------------|---------------|--------------|--------------|---------------|--------------|--------------|---------------|--------------|--------------|--------------|--------------|-------|--------------|-------------|-------------|---------------|--------------|---------------|--------------|
| MSY                  | <b>-2.18</b>  |              |              | <b>-3.02</b>  |              |              | -2.05         |              |              | <b>-5.73</b> |              |       | <b>1.80</b>  |             |             | 9.04          |              |               |              |
| PAL                  | <b>2.51</b>   | 0.79         |              | <b>8.64</b>   | 2.12         |              | -1.04         |              |              | <b>5.55</b>  |              |       | 0.00         | -0.04       |             | -2.82         | -1.20        |               |              |
| PAY                  |               |              |              |               |              |              | <b>-1.54</b>  |              |              |              |              |       |              |             |             |               |              |               |              |
| PUY                  | -0.83         |              |              | -1.92         |              |              | -             |              |              | 2.15         |              |       | <b>0.59</b>  |             |             | <b>-2.69</b>  |              |               |              |
| UGR                  | -0.17         |              |              | 0.11          |              |              | -0.68         |              |              | 1.24         |              |       | <b>0.62</b>  |             |             | 1.08          |              |               |              |
| ZSF                  |               |              |              |               |              |              | <b>-23.63</b> |              |              |              |              |       |              |             |             |               |              |               |              |
| <b>North America</b> |               |              |              |               |              |              |               |              |              |              |              |       |              |             |             |               |              |               |              |
| ACA                  | <b>-2.21</b>  | <b>-1.45</b> | <b>-1.01</b> |               |              |              |               |              |              |              |              |       |              |             |             |               |              |               |              |
| APP                  | <b>-1.58</b>  |              |              | <b>-2.89</b>  |              |              | <b>-7.44</b>  |              |              | <b>1.13</b>  |              |       | <b>0.80</b>  |             |             | <b>-0.82</b>  |              | <b>14.80</b>  |              |
| BND                  | <b>-1.47</b>  | <b>-1.04</b> | <b>-0.72</b> | <b>-3.35</b>  | <b>-2.13</b> | <b>-1.49</b> | <b>-3.63</b>  | <b>-3.42</b> | <b>-1.37</b> | <b>-1.93</b> | -0.30        | -0.39 | 0.22         | <b>0.30</b> | 0.10        | <b>0.71</b>   | 0.13         | <b>0.46</b>   |              |
| CPR                  | <b>0.78</b>   |              |              | <b>2.42</b>   |              |              | -11.68        |              |              | <b>6.25</b>  |              |       | -0.06        |             |             | <b>-10.55</b> |              | 19.42         |              |
| EGB                  | -0.06         |              |              | <b>3.16</b>   |              |              | <b>15.18</b>  |              |              | -0.52        |              |       | <b>1.56</b>  |             |             | <b>-3.25</b>  | <b>-3.00</b> |               |              |
| GBN                  | <b>-4.21</b>  |              |              |               |              |              |               |              |              |              |              |       |              |             |             |               |              |               |              |
| GLR                  | 0.58          |              |              |               |              |              |               |              |              |              |              |       |              |             |             |               |              |               |              |
| HGC                  | <b>-3.64</b>  | <b>-2.76</b> | <b>-1.36</b> |               |              |              |               |              |              |              |              |       |              |             |             |               |              |               |              |
| MCN                  | <b>-1.54</b>  | <b>-1.36</b> | <b>-1.04</b> |               |              |              |               |              |              |              |              |       |              |             |             |               |              |               |              |
| MRN                  | -0.03         | -0.32        | <b>-0.59</b> |               |              |              |               |              |              |              |              |       |              |             |             |               |              |               |              |
| RMN                  | <b>-3.04</b>  |              |              |               |              |              |               |              |              |              |              |       |              |             |             |               |              |               |              |
| SGP                  | <b>-1.04</b>  | <b>-0.86</b> | <b>-0.58</b> | <b>-2.30</b>  | <b>-2.10</b> | <b>-1.10</b> | -2.06         |              |              | -1.17        |              |       | <b>0.56</b>  | <b>0.17</b> | <b>0.32</b> | <b>-1.32</b>  | <b>-1.35</b> | <b>-1.06</b>  | <b>7.01</b>  |
| SHN                  | <b>-1.88</b>  | <b>-1.68</b> | <b>-1.16</b> |               |              |              |               |              |              |              |              |       |              |             |             |               |              |               |              |
| THD                  | <b>-1.99</b>  |              |              | <b>-6.43</b>  |              |              | -4.95         |              |              | -1.44        |              |       | <b>0.36</b>  |             |             | <b>19.33</b>  |              | 3.87          |              |
| <b>South Pacific</b> |               |              |              |               |              |              |               |              |              |              |              |       |              |             |             |               |              |               |              |
| CGO                  | <b>2.21</b>   |              |              |               |              |              | -0.59         |              |              | <b>5.51</b>  |              |       |              |             |             |               |              |               |              |
| MLO                  | <b>-32.28</b> | 2.54         | 6.45         | -0.08         | <b>0.90</b>  |              | <b>-2.81</b>  | <b>1.72</b>  |              | 3.59         | <b>-3.58</b> |       | <b>1.75</b>  | <b>0.60</b> |             | -3.00         | <b>-8.07</b> | <b>-4.40</b>  | <b>26.87</b> |
| <b>Polar regions</b> |               |              |              |               |              |              |               |              |              |              |              |       |              |             |             |               |              |               |              |
| ALT                  | <b>-2.57</b>  |              |              | -3.13         |              |              | -1.93         |              |              | 1.25         |              |       | <b>0.86</b>  |             |             | 3.42          |              | 9.69          |              |
| BRW                  | <b>-3.32</b>  | 0.01         | 0.21         | <b>-10.06</b> | 1.93         | 2.75         | <b>-2.76</b>  | 1.63         | 0.30         | 2.94         | 13.80        | 2.20  | <b>1.32</b>  | <b>0.47</b> | <b>0.20</b> | 1.11          | -9.69        | <b>-22.49</b> | 5.28         |
| NMY                  | 3.73          |              |              | 0.18          |              |              | <b>-0.81</b>  |              |              | 2.94         |              |       | <b>-0.86</b> |             |             | -45.17        |              |               |              |
| SPO                  | 1.55          | -0.27        | <b>2.87</b>  | <b>3.17</b>   | 0.22         |              |               |              |              |              |              |       | <b>3.69</b>  | 0.29        |             | <b>-5.89</b>  | <b>-5.46</b> | <b>-4.99</b>  |              |
| SUM                  |               |              |              |               |              |              | -0.61         | -0.58        |              |              |              |       |              |             |             |               |              |               |              |
| TIK                  |               |              |              |               |              |              | -14.66        |              |              |              |              |       |              |             |             |               |              | -4.37         |              |
| ZEP                  | <b>5.72</b>   |              |              | <b>4.75</b>   |              |              | 0.39          |              |              | <b>3.49</b>  |              |       | 0.22         | 0.22        |             | -3.65         | -1.11        | -3.65         | 0.78         |

#### 4) Evolution of 10y trends

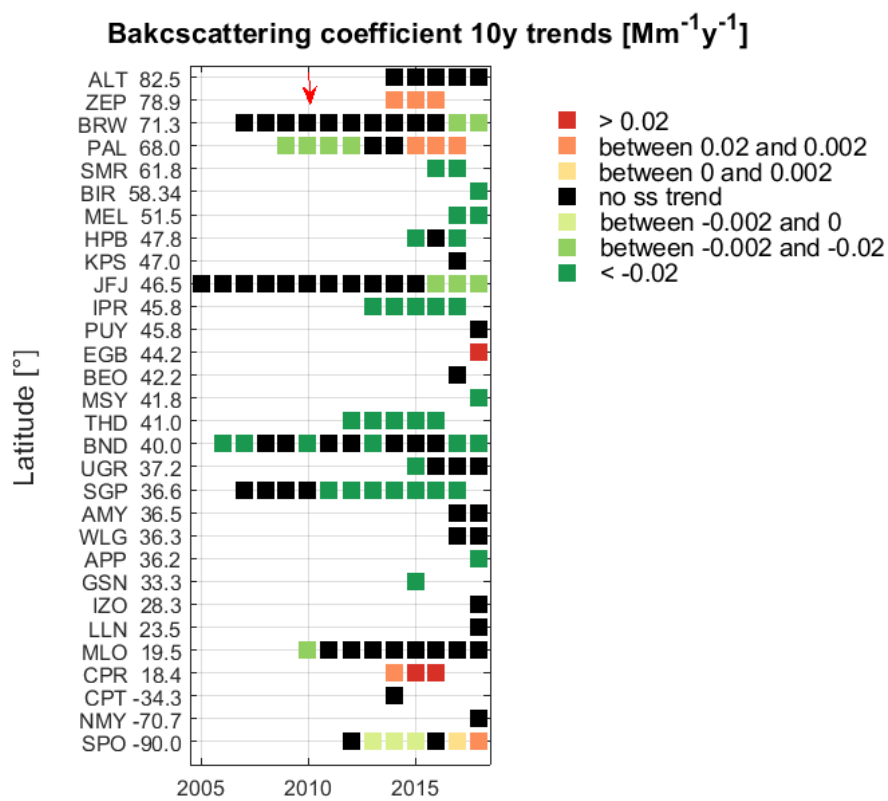

Fig. S7: Time series of 10y backscattering coefficient trends as a function of station latitude.

#### 5) RH trends

**Table S4:** MK present-day trends in %/y of RH measured by the nephelometer. The ss trends are given in bold.

|     | MK 10y       | MK 20y       | MK 30y      |
|-----|--------------|--------------|-------------|
| ACA | 0.00         | 0.04         | 0.04        |
| APP | <b>-0.34</b> | <b>-0.33</b> |             |
| BND | -0.08        | 0.11         | <b>0.11</b> |
| CPR | <b>0.08</b>  |              |             |
| EGB | <b>-0.51</b> |              |             |
| GBN | -0.25        |              |             |
| GLR | -0.03        |              |             |
| MCN | -0.06        | 0.02         | 0.06        |
| MRN | <b>0.08</b>  | 0.00         | -0.03       |
| RMN | 0.04         |              |             |
| SHN | <b>0.31</b>  | <b>0.15</b>  | <b>0.13</b> |

|     |              |              |       |
|-----|--------------|--------------|-------|
| THD | <b>-0.30</b> |              |       |
| HGC | -0.18        | -0.12        | -0.02 |
| BEO | -0.23        |              |       |
| BIR | <b>-0.13</b> |              |       |
| HPB | 0.03         |              |       |
| HYY | <b>0.12</b>  |              |       |
| IPR | -0.17        |              |       |
| MSY | -0.18        |              |       |
| PAL | 0.14         | 0.09         |       |
| PUY | <b>0.30</b>  |              |       |
| UGR | <b>-0.55</b> |              |       |
| AMY | <b>0.56</b>  |              |       |
| LLN | <b>-1.80</b> | <b>-1.88</b> |       |
| ALT | 0.00         |              |       |
| BRW | 0.04         | <b>0.05</b>  |       |
| IZO | <b>-0.72</b> |              |       |
| CGO | -0.02        |              |       |

#### 6) Relation between SSA trends and absorption and scattering trends

The SSA trends depend directly on  $\sigma_{sp}$  and  $\sigma_{ap}$  trends. A  $\sigma_{ap}$  trend expressed in %/y larger (lower) than the  $\sigma_{sp}$  trend will result in a decreasing (increasing) SSA trend, respectively (see Fig. S7). In contrast, when the  $\sigma_{ap}$  trend (in %) is lower than the  $\sigma_{sp}$  trend an increasing SSA trend will result. The cyan and green curves in Fig. 7 give an idea of the variability of the SSA trend corresponding to Aethalometer measurement error (30%) as well as to the potential  $C_{ref}$  errors for continental background aerosol (about 30% for  $C_{ref}$  between 2.5 and 4.5). The figure suggests that higher  $\sigma_{ap}/\sigma_{sp}$  ratios lead to larger SSA trends for similar  $\sigma_{ap}$  and  $\sigma_{sp}$  trends. However, the simple rule still holds that when the  $\sigma_{ap}$  trend is larger than the  $\sigma_{sp}$  trend, the SSA trend will be decreasing (i.e., the aerosol will be getting darker).

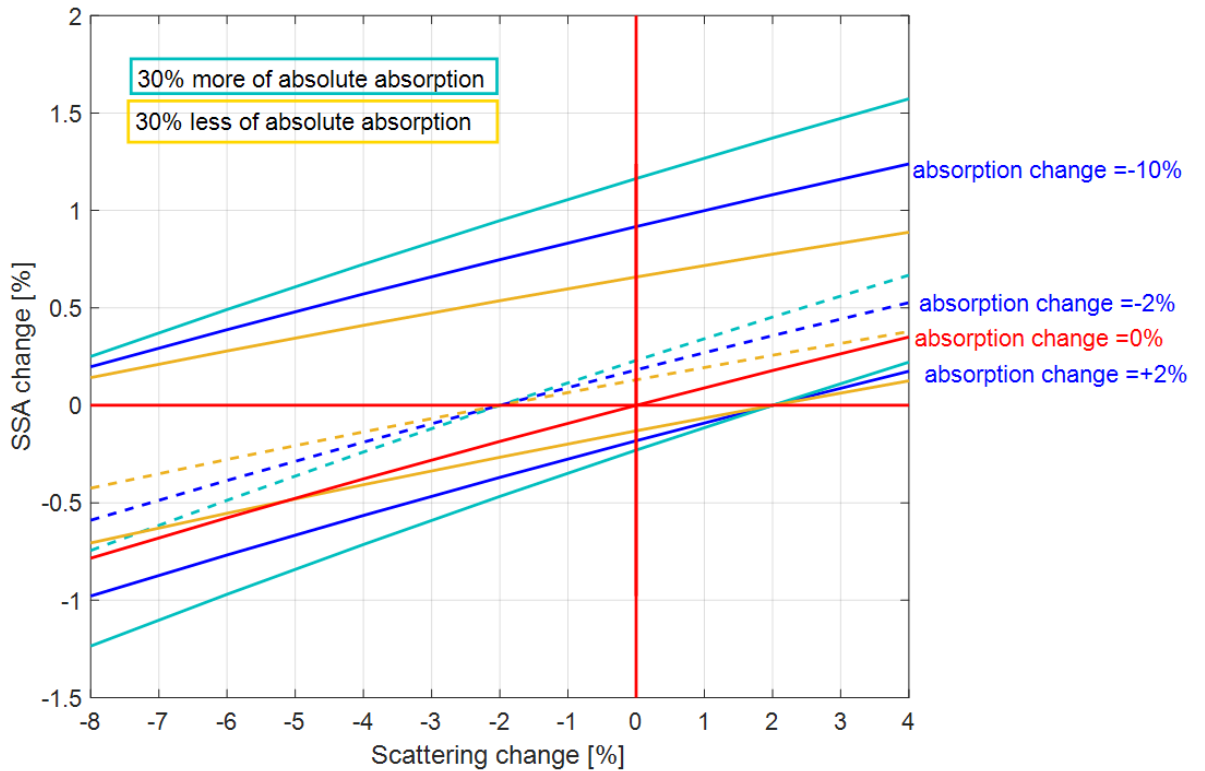

**Figure S8:** Single scattering albedo change as a function of the scattering coefficient change for several absorption coefficient changes. The change are always given in %. The  $\sigma_{ap}/\sigma_{sp}$  for the dark blue lines is of 0.1. The green and cyan lines represent the same curves but for an increase of absorption of +30% and -30% respectively, corresponding to  $\sigma_{ap}/\sigma_{sp}$  equal to 0.133 and 0.067. The chosen  $\sigma_{ap}$  and  $\sigma_{sp}$  trend ranges correspond to the results of this study and the SSA trend range of this study is of -1% to 0.4%.
